# Supplementary material for: OsABF1 Represses Gibberellin Biosynthesis to Regulate Plant Height and Seed Germination in Rice (Oryza sativa L.)
Source: MDPI journal article supplement (doi:10.3390/ijms222212220), 2021-11-12
Supplement: s1 [file s1]

## Supplement figures

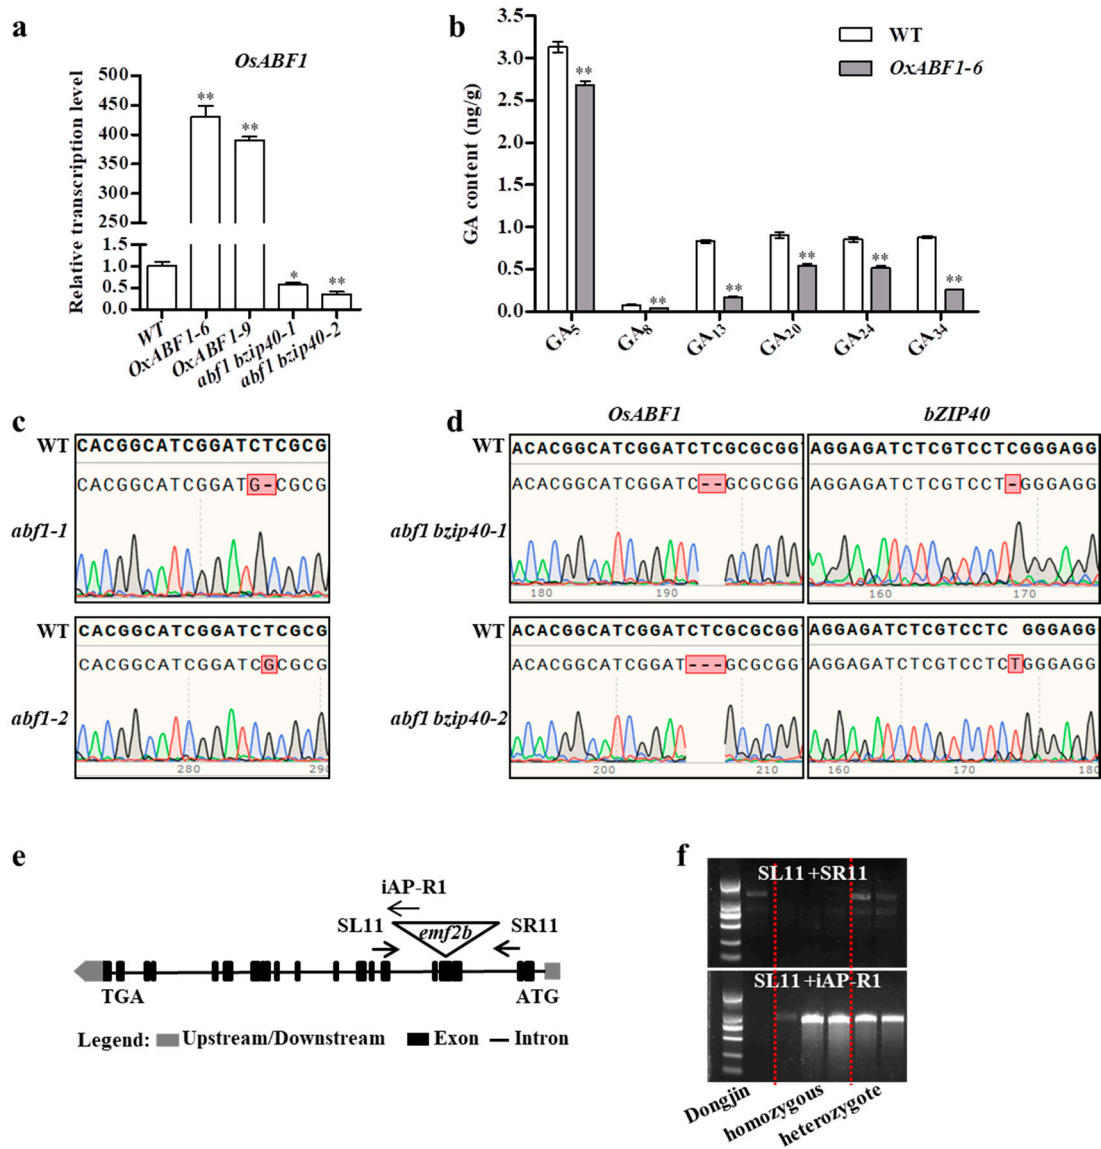

**Figure S1.** Genotypes of mutant and over-expression lines. **(a)** qRT-PCR analysis of *OsABF1* transcription in WT, *OxABF1-6*, *OxABF1-9*, *abf1bzp40-1* and *abf1bzp40-2* leaves at tillering stage. **(b)** Quantification of GAs derivative of WT and *OxABF1-6* seedlings analyzed with liquid chromatography-tandem mass spectrometry. Error bars represent means  $\pm$  SD ( $n = 3$ ). \*,  $P < 0.05$ , \*\*,  $P < 0.01$  by Student's  $t$ -test analysis. **(c)** Sanger sequencing of the target sites of single mutant lines: *abf1-1* and *abf1-2*. **(d)** Sanger sequencing of the target sites of double mutants: *abf1bzp40-1* and *abf1bzp40-2*. **(e)** Gene structure of *OsEMF2B*. **(f)** T-DNA detection by gel electrophoresis, primers SL11 and SR11 were used in up gel; primers SL11 and iAP-R1 were used in bottom gel.

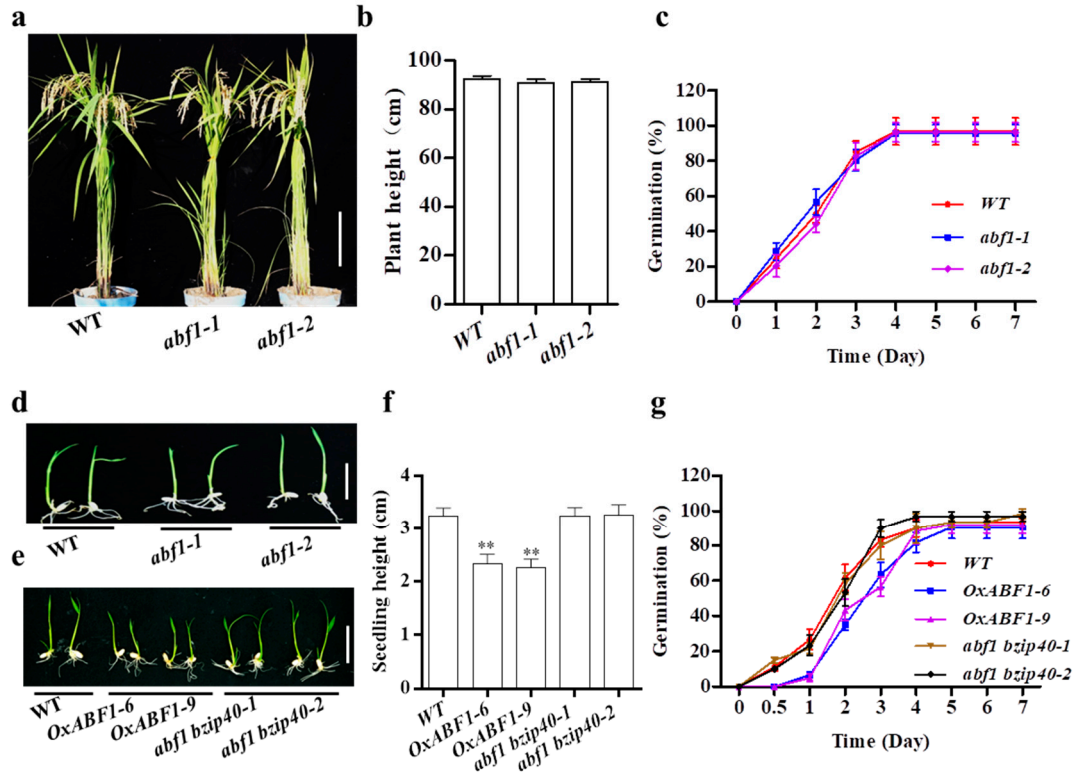

**Figure S2.** Phenotypes of *abf1*, *abf1bzp40* and *OsABF1* over-expression lines. (a) Phenotypes of *abf1-1* and *abf1-2*. (b) Plant height of *abf1-1* and *abf1-2*. (c) Seed germination time courses of *abf1-1* and *abf1-2*. (d) After 7 days' seed germination phenotypes of WT, *abf1-1* and *abf1-2*. (e-g), seed germination phenotypes (e), seedlings height (f) and Seed germination time courses (g) of WT, *OxABF1-6*, *OxABF1-9*, *abf1 bzp40-1* and *abf1 bzp40-2* (g). b-c and f-g, error bars represented means  $\pm$  SD ( $n = 20$ ). \*\*,  $P < 0.01$  by Student's  $t$ -test analysis.

**Table S1.** Sequences of primers used in this study.

| Name               | Gene ID              | Primer sequence (5' to 3')                  | Usage                      |
|--------------------|----------------------|---------------------------------------------|----------------------------|
| OxABF1-F           | LOC_Os01g64730       | TTACTTCTGCACTAGGTACCATGATGGCGTCGAGGGTGAT    | over-expression            |
| OxABF1-R           |                      | GAATTCCCGGGGATCCCTACCACTCCATCGAGTTTG        |                            |
| OxABF1-U3-F        |                      | ggcACACGGCATCGGATCTCGCG                     | Crispr-cas9<br>mutation    |
| OxABF1-U3-R        |                      | AAACCGCGAGATCCGATGCCGTG                     |                            |
| CrOsABF1-test<br>F |                      | TCCGTAATAAGACCACCAACCT                      | mutation site<br>detection |
| CrOsABF1-test<br>R |                      | CGGCATGTCGGCGTAGAT                          |                            |
| bzip40-U6a-F       | LOC_Os05g36160       | gccGAGGAGATCTCGTCTCGGG                      | Crispr-cas9<br>mutation    |
| bzip40-U6a-R       |                      | AAACCCCGAGGACGAGATCTCCT                     |                            |
| Crbzip40-test<br>F |                      | AGGAGCACCAGCAGCGGCATCG                      | mutation site<br>detection |
| Crbzip40-test<br>R |                      | CGTCATCTCAGGCCGCCACCC                       |                            |
| Ubi-qRT-F          | GenBank<br>accession | GCTCCGTGGCGGTATCAT                          | qRT-PCR                    |
| Ubi-qRT-R          | No.AF184280          | CGGCAGTTGACAGCCCTAG                         |                            |
| OxABF1-qRT-F       | LOC_Os01g64730       | CTGATGGATCCGATGGACCG                        |                            |
| OxABF1-qRT-R       |                      | GCGACTCGAGCTCAGCAATA                        |                            |
| OxABF1-F           | LOC_Os01g64730       | CTGGTTCCGCGTGGATCCATGATGGCGTCGAGGGTGAT      | Pull down                  |
| OxABF1-R           |                      | CTCGAGTCGACCCGGAATTCCTACCACTCCATCGAGTTTG    |                            |
| OsEMF2b-F          | LOC_Os09g13630       | TGGGT CGCGG ATCCG AATTCATGTGCCGCCACCAGCCA   |                            |
| OsEMF2b-R          |                      | TCGAGTGCGGCCGCAAGCTTCAATTTTTCTTTGGATCCG     |                            |
| OxABF1-F           | LOC_Os01g64730       | ATTATGCCTCTCCGAATTCATGATGGCGTCGAGGGTGATGG   | Y1H                        |
| OxABF1-R           |                      | GAAGTCCAAAGCTTCTCGAGCTACCACTCCATCGAGTTTGT   |                            |
| SD1- F             | LOC_Os01g66100       | CTTGAATTCGAGCTCGGTACCTTGCAATAACCGCGTGGTTT   |                            |
| SD1-R              |                      | ATACAGAGCACATGCCTCGAGGAGATTGGAGATGAGAAGTG   |                            |
| OxABF1-F           | LOC_Os01g64730       | TGGCCATGGAGGCCGAATTCATGATGGCGTCGAGGGTGAT    | Y2H                        |
| OxABF1-R           |                      | CGCTGCAGGTGACGGATCCCTACCACTCCATCGAGTTTG     |                            |
| OsEMF2b-F          | LOC_Os09g13630       | CCATG GAG GCC ATG GAA TTCATGTGCCGCCACCAGCCA |                            |
| OsEMF2b-R          |                      | AGCTCGAGCTCGATGGATCCAATTTTTCTTTGGATCCG      |                            |
| OxABF1-F           | LOC_Os01g64730       | GTAGTCACGTGACGTCCGGAATGATGGCGTCGAGGGTGA     | BIFC                       |
| OxABF1-R           |                      | GCTCCACCAGAACCTCCGGACCACTCCATCGAGTTTGT      |                            |
| OsEMF2b-F          | LOC_Os09g13630       | GTGGAGGTGGGTGAGGATCCATGTGCCGCCACCAGCCA      |                            |
| OsEMF2b-R          |                      | AGGGCGCGCCCCATGGATCC ATTTTCTTTGGATCCGAGC    |                            |
| OxABF1-F           | LOC_Os01g64730       | TCTCTAGAACTAGTGGATCC ATGATGGCGTCGAGGGTGA    | Luciferase activity        |
| OxABF1-R           |                      | ATAAGCTTGATATCGAATTC CTACCACTCCATCGAGTTTG   |                            |
| SD1-F              | LOC_Os01g66100       | CCCAAGCTTTTGCAATAACCGCGTGGTTT               |                            |

|                     |                |                                |           |
|---------------------|----------------|--------------------------------|-----------|
| SD1-R               |                | GAAGATCTTCGAGATTGGAGATGAGAAGTG |           |
| SD1 <i>Pro</i> -1-F | LOC_Os01g66100 | AGCTAGCTTGATCGTGGCTC           | Chip -PCR |
| SD1 <i>Pro</i> -1-R |                | ACCACCCATGCACCATACAG           |           |
| SD1 <i>Pro</i> -2-F |                | ATCTGTCTCGTAACAGCCCC           |           |
| SD1 <i>Pro</i> -2-R |                | AACCTCTGGTAGCTTATCGATT         |           |
| SD1 <i>Pro</i> -3-F |                | CCGGTGTTACACGTGCTCTA           |           |
| SD1 <i>Pro</i> -3-R |                | CACGTGGAAAACTAAACCTCTGG        |           |
| SD1 <i>Pro</i> -4-F |                | ACCAGAGGTTTAGTTTCCACG          |           |
| SD1 <i>Pro</i> -4-R |                | GCGATCGCCTAAACTAGCCT           |           |
| SD1 <i>Pro</i> -5-F |                | ATGTCTGTCCAGTGGCAACC           |           |
| SD1 <i>Pro</i> -5-R |                | GCAGGAGGGTGGGGTATTTG           |           |
| SD1 <i>Pro</i> -6-F |                | GTGCAACTACTACCCGCCAT           |           |
| SD1 <i>Pro</i> -6-R |                | AAGGTGTCGCCGATGTTGAT           |           |
| Actin-F             | LOC_Os03g50885 | GAAATGGAGACTGCCAAGACC          |           |
| Actin-R             |                | TTGGCAATCCACATCTGCTG           |           |
